# Supplementary material for: The Myelin‐Weighted Connectome in Parkinson's Disease
Source: PubMed Central journal article supplement (PMC9303520; doi:10.1002/mds.28891), 2021-12-22
Supplement: MDS-37-724-s001.pdf [file MDS-37-724-s001.pdf]

# Supplementary Materials

## Brain atlas

Table S1. Brain ROIs

| Location | ROI                      |
|----------|--------------------------|
| Frontal  | paracentral              |
| Frontal  | precentral               |
| Frontal  | caudalanteriorcingulate  |
| Frontal  | parsopercularis          |
| Frontal  | parstriangularis         |
| Frontal  | lateralorbitofrontal     |
| Frontal  | medialorbitofrontal      |
| Frontal  | frontalpole              |
| Frontal  | rostralmiddlefrontal     |
| Frontal  | caudalmiddlefrontal      |
| Frontal  | parsorbitalis            |
| Frontal  | rostralanteriorcingulate |
| Frontal  | superiorfrontal          |
| Parietal | postcentral              |

|           |                    |
|-----------|--------------------|
| Parietal  | posteriorcingulate |
| Parietal  | superiorparietal   |
| Parietal  | supramarginal      |
| Parietal  | inferiorparietal   |
| Parietal  | isthmuscingulate   |
| Parietal  | precuneus          |
| Temporal  | fusiform           |
| Temporal  | parahippocampal    |
| Temporal  | superiortemporal   |
| Temporal  | transversetemporal |
| Temporal  | bankssts           |
| Temporal  | entorhinal         |
| Temporal  | inferiortemporal   |
| Temporal  | temporalpole       |
| Temporal  | middletemporal     |
| Occipital | cuneus             |
| Occipital | lateraloccipital   |
| Occipital | lingual            |

|               |                 |
|---------------|-----------------|
| Occipital     | pericalcarine   |
| Insular       | insula          |
| Subcortical   | Hippocampus     |
| Subcortical   | Amygdala        |
| Subcortical   | ThalamusProper  |
| Subcortical   | NucleusBasalis  |
| Basal ganglia | Caudate         |
| Basal ganglia | Putamen         |
| Basal ganglia | Pallidum        |
| Basal ganglia | AccumbensArea   |
| Basal ganglia | SubstantiaNigra |
| Brainstem     | LocusCoeruleus  |
| Brainstem     | Midbrain        |
| Brainstem     | Pons            |
| Brainstem     | Medulla         |

## PLS Analysis

The partial least squares (PLS) analysis<sup>1,2</sup> is a multivariate statistical technique that tries to identify a linear combination of connections that maximally covary with an experimental design or behavioral/clinical scores.

For each pair (HC vs. PD ; HC vs. PDnonRBD; HC vs. PDRBD), the two sets of variables were defined as  $\mathbf{X}_{n \times p}$  and  $\mathbf{Y}_{n \times 1}$ .  $\mathbf{X}_{n \times p}$  corresponds to the non-zero connections shared between the groups, while  $\mathbf{Y}_{n \times 1}$  is a matrix that corresponds to the experiment design, where  $n$  corresponds to number of subjects,  $p$  corresponds to number of unique connections. The resulting sizes for the two sets of variables for each pair of groups was HC vs. PD:  $X_{116 \times 1360}$  and  $Y_{116 \times 1}$ ; HC vs PDnonRBD:  $X_{81 \times 1360}$  and  $Y_{81 \times 1}$ ; HC vs PDRBD:  $X_{57 \times 1349}$  and  $Y_{57 \times 1}$ . Because the connectivity matrices are symmetric, we extracted the elements of the upper triangle that correspond to unique non-zero connections that are shared between the groups. We then stacked the unique connections on top of each other, i.e., each row of  $\mathbf{X}$  corresponds to the unique connections of the subjects (both HC and PD group, HC and PDnonRBD, and HC and PDRBD), while  $\mathbf{Y}$  contains the experimental design. For each pair of groups, a mean-centered matrix  $\mathbf{M}^{\text{dev}}_{2 \times p}$ , was then computed from  $\mathbf{X}$  and  $\mathbf{Y}$ , by removing the grand mean from  $\mathbf{X}$  for each group as defined in  $\mathbf{Y}$ , reflecting the covariation of each connection with the experimental design.

For the behavioural PLS, we aimed to identify the connections that maximally covaried with the MDS-UPDRS III score. The only difference from the mean-centering PLS is that the  $\mathbf{Y}_{n \times 1}$  contains the MDS-UPDRS III scores for each subject and the  $\mathbf{M}^{\text{dev}}_{2 \times p} = \mathbf{Y}'\mathbf{X}$ .

Afterwards, a singular value decomposition (SVD) was applied to the  $\mathbf{M}^{\text{dev}}_{2 \times p}$  matrix which resulted in a set of 2 mutually orthogonal latent variables (LVs):

$$\text{SVD}(\mathbf{M}^{\text{dev}}_{2 \times p}) = \mathbf{U}_{p \times 2} \mathbf{\Delta}_{2 \times 2} \mathbf{V}_{2 \times 2}'$$

where  $\mathbf{U}$  and  $\mathbf{V}$  are the left and right singular vectors, and  $\mathbf{\Delta}$  is a diagonal matrix with singular values along the diagonal. Each latent variable is composed of left and right singular vectors and a singular value. For example the first latent variable is composed of the left and right singular vectors (first column of  $\mathbf{U}$  and  $\mathbf{V}$ ) reflecting the contribution of the and the singular value (first element of the diagonal matrix  $\mathbf{\Delta}$ ). In our case the left singular vector provides the contribution of each connection to its respective LV, while the right singular vector reflects the contribution of the design variable to its respective LV and can be seen as a contrast. Furthermore, the singular value reflects the covariance between the two sets.

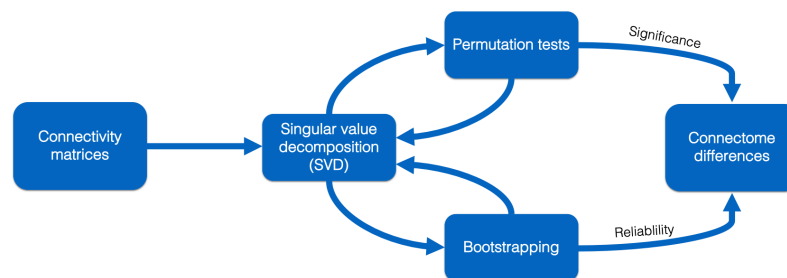

Figure S1. PLS analysis procedure

## Ring-based analysis

Table S2. List of the regions belonging to the first ring for each epicenter and for at least 60% of the subjects in each group.

| First Ring       |                  |                  |                  |          |                  |                  |                 |
|------------------|------------------|------------------|------------------|----------|------------------|------------------|-----------------|
| SN               | NBM              | Amygdala         | Hippocampus      | LC       | Midbrain         | Pons             | Medulla         |
| lateraloccipital | AccumbensArea    | Hippocampus      | AccumbensArea    | Thalamus | Amygdala         | AccumbensArea    | Caudate         |
| postcentral      | Amygdala         | Midbrain         | Amygdala         | Midbrain | Caudate          | Amygdala         | Nucleus Basalis |
| precentral       | Caudate          | Nucleus Basalis  | Caudate          | Pons     | Hippocampus      | Caudate          | superiorfrontal |
| superiorfrontal  | Hippocampus      | Pons             | Midbrain         | Medulla  | Nucleus Basalis  | Hippocampus      |                 |
| NucleusBasalis   | Medulla          | Putamen          | Nucleus Basalis  |          | lingual          | NucleusBasalis   |                 |
| Thalamus         | Midbrain         | Thalamus         | Pallidum         |          | middletemporal   | Pallidum         |                 |
| Caudate          | Pallidum         | fusiform         | Pons             |          | precentral       | Putamen          |                 |
| Amygdala         | Pons             | inferiortemporal | Putamen          |          | superiorfrontal  | Thalamus         |                 |
| postcentral      | Putamen          | lateraloccipital | Thalamus         |          | superiortemporal | isthmuscingulate |                 |
| precentral       | SubstantiaNigra  | lingual          | cuneus           |          |                  | lateraloccipital |                 |
| precuneus        | Thalamus         | superiorparietal | entorhinal       |          |                  | postcentral      |                 |
| superiorfrontal  | fusiform         | superiortemporal | fusiform         |          |                  | precuneus        |                 |
| Pons             | inferiortemporal | temporalpole     | inferiorparietal |          |                  | superiorfrontal  |                 |

|  |                     |  |                     |  |  |                  |  |
|--|---------------------|--|---------------------|--|--|------------------|--|
|  | lateraloccipital    |  | inferiortemporal    |  |  | superiorparietal |  |
|  | lingual             |  | insula              |  |  |                  |  |
|  | medialorbitofrontal |  | isthmuscingulate    |  |  |                  |  |
|  | middletemporal      |  | lateraloccipital    |  |  |                  |  |
|  | pericalcarine       |  | lingual             |  |  |                  |  |
|  | precuneus           |  | medialorbitofrontal |  |  |                  |  |
|  | superiorfrontal     |  | middletemporal      |  |  |                  |  |
|  | superiorparietal    |  | parahippocampal     |  |  |                  |  |
|  | superiortemporal    |  | pericalcarine       |  |  |                  |  |
|  | temporalpole        |  | precuneus           |  |  |                  |  |
|  |                     |  | superiorfrontal     |  |  |                  |  |
|  |                     |  | superiorparietal    |  |  |                  |  |
|  |                     |  | superiortemporal    |  |  |                  |  |
|  |                     |  | temporalpole        |  |  |                  |  |

## Mean-centered PLS

Table S3. Multivariate connectivity pattern from the mean-centered PLS analysis between HC and PD Group. The reported labels correspond to the labels as defined in the Desikan-Killiany atlas.

|                 |                    |
|-----------------|--------------------|
| SubstantiaNigra | postcentral_l      |
| SubstantiaNigra | precentral_l       |
| SubstantiaNigra | precuneus_l        |
| SubstantiaNigra | superiorfrontal_l  |
| SubstantiaNigra | superiorparietal_l |
| SubstantiaNigra | Caudate            |
| SubstantiaNigra | precentral_r       |
| SubstantiaNigra | precuneus_r        |
| SubstantiaNigra | superiorfrontal_r  |
| SubstantiaNigra | Midbrain           |
| SubstantiaNigra | Pons               |
| SubstantiaNigra | Medulla            |
| ThalamusProper  | LocusCoeruleus     |
| Hippocampus     | Amygdala           |
| LocusCoeruleus  | Midbrain           |

Table S4. Multivariate connectivity pattern from the mean-centered PLS analysis between HC and PDnonRBD group. The reported labels correspond to the labels as defined in the Desikan-Killiany atlas.

|                 |                    |
|-----------------|--------------------|
| SubstantiaNigra | postcentral_l      |
| SubstantiaNigra | precentral_l       |
| SubstantiaNigra | precuneus_l        |
| SubstantiaNigra | superiorfrontal_   |
| SubstantiaNigra | superiorparietal_l |
| SubstantiaNigra | Caudate            |
| SubstantiaNigra | postcentral_r      |
| SubstantiaNigra | precentral_r       |
| SubstantiaNigra | precuneus_r        |
| SubstantiaNigra | superiorfrontal_r  |
| SubstantiaNigra | Midbrain           |
| SubstantiaNigra | Pons               |
| SubstantiaNigra | Medulla            |
| ThalamusProper  | Amygdala           |
| ThalamusProper  | LocusCoeruleus     |
| ThalamusProper  | NucleusBasalis     |
| Hippocampus     | Amygdala           |
| LocusCoeruleus  | Midbrain           |
| LocusCoeruleus  | Pallidum           |



Table S5. Multivariate connectivity pattern from the mean-centered PLS analysis between HC and PDRBD group. The reported labels correspond to the labels as defined in the Desikan-Killiany atlas.

|                 |                    |
|-----------------|--------------------|
| SubstantiaNigra | precuneus_l        |
| SubstantiaNigra | isthmuscingulate_l |
| SubstantiaNigra | lateraloccipital_l |
| SubstantiaNigra | superiorfrontal_l  |
| SubstantiaNigra | superiorparietal_l |
| SubstantiaNigra | Caudate            |
| SubstantiaNigra | postcentral_r      |
| SubstantiaNigra | precentral_r       |
| SubstantiaNigra | precuneus_r        |
| SubstantiaNigra | superiorfrontal_r  |
| SubstantiaNigra | Midbrain           |
| SubstantiaNigra | Pons               |
| SubstantiaNigra | Medulla            |
| ThalamusProper  | NucleusBasalis     |
| ThalamusProper  | Amygdala           |
| Hippocampus     | postcentral_l      |
| Hippocampus     | Amygdala           |
| Putamen         | AccumbensArea      |
| Midbrain        | parsopercularis_r  |

Table S6. Mean and standard deviation of the median R1 distribution for each epicenter in the two groups. No significant difference was observed for any epicenter (i.e. all the p-values were equal to 1).

|             | HC             | PD           |
|-------------|----------------|--------------|
| SN          | 1.08 ± 0.027   | 1.15 ± 0.03  |
| NBM         | 0.78 ± 0.02    | 0.82 ± 0.023 |
| Hippocampus | 0.7527 ± 0.016 | 0.79 ± 0.014 |
| Amygdala    | 0.7596 ± 0.018 | 0.8 ± 0.017  |
| LC          | 0.9917 ± 0.028 | 1.05 ± 0.027 |
| Midbrain    | 1.0544 ± 0.025 | 1.12 ± 0.026 |
| Pons        | 1.0968 ± 0.028 | 1.15 ± 0.026 |
| Medulla     | 1.0352 ± 0.023 | 1.09 ± 0.019 |

## DWI and NODDI processing

To complement the myelin weighted network, we also weighted the structural brain network with measures computed from the DWI data, specifically fractional anisotropy (FA), mean diffusivity (MD), and the intracellular volume fraction (ICVF), the former ones calculated using a tensor representation, the latter obtained using the neurite orientation dispersion and density imaging (NODDI) model<sup>3</sup>. The diffusion images were first preprocessed, with the same preprocessing pipeline as explained in the manuscript, to remove the known artifacts. Tensor-based measures were computed using MRtrix 3.0. Then, the preprocessed images were used to fit the NODDI model<sup>3</sup> using the open-source tool AMICO<sup>4</sup> (<https://github.com/daducci/AMICO> commit hash: [9fcb61b](https://github.com/daducci/AMICO/commit/9fcb61b)). The procedure to map ICVF to the tractogram is the same as for the R1. Afterwards, we performed the PLS analysis between the HC and the PD groups. The results are shown in Figures S2-S3.

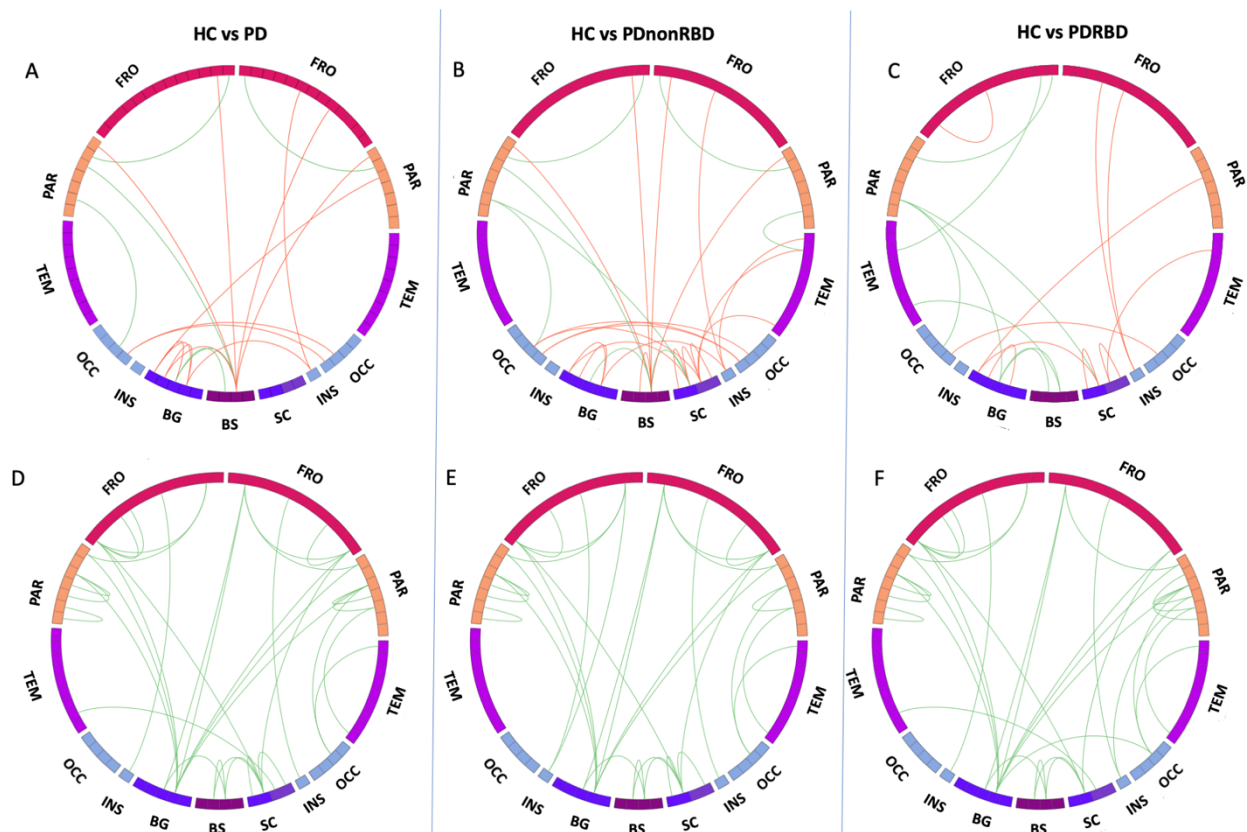

Figure S2. Mean-centering PLS of the FA (top row: A, B, C) and MD (bottom row: D, E, F). The red links correspond to higher metric (FA or MD) in HC compared to the patients, while the green links correspond to lower metric (FA or MD) in the HC compared to the patients. FRO (Frontal lobe), PAR (Parietal lobe), TEM (Temporal lobe), OCC (Occipital lobe), SC (Subcortical regions including: amygdala, hippocampus, thalamus, and nucleus basalis of Meynert), BG (Basal ganglia), BS (Brain stem).

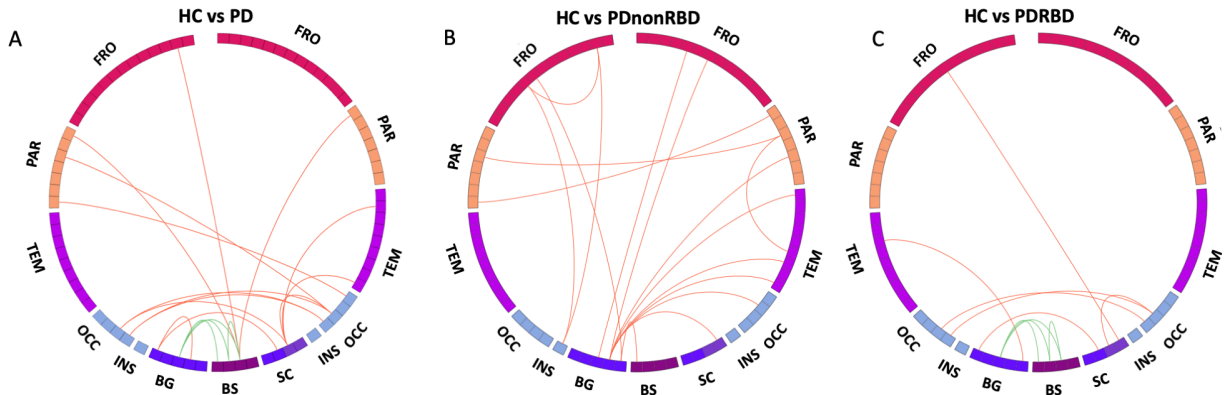

Figure S3. Connectogram of the multivariate connectivity pattern obtained with mean-centering PLS, composed of the connections that maximally covary between the groups. The connections in red showed decreased ICVF in the PD groups compared to HC, while the connections in green showed increased ICVF in the PD group compared to HC. FRO (Frontal lobe), PAR (Parietal lobe), TEM (Temporal lobe), OCC (Occipital lobe), SC (Subcortical regions including: amygdala, hippocampus, thalamus, and nucleus basalis of Meynert), BG (Basal ganglia), BS (Brain stem).

## References

1. McIntosh AR, Lobaugh NJ. Partial least squares analysis of neuroimaging data: Applications and advances. In: *NeuroImage*. Vol 23. Academic Press; 2004:S250-S263. doi:10.1016/j.neuroimage.2004.07.020
2. Krishnan A, Williams LJ, McIntosh AR, Abdi H. Partial Least Squares (PLS) methods for neuroimaging: A tutorial and review. *Neuroimage*. 2011;56(2):455-475. doi:10.1016/j.neuroimage.2010.07.034
3. Zhang H, Schneider T, Wheeler-Kingshott CA, Alexander DC. NODDI: Practical in vivo neurite orientation dispersion and density imaging of the human brain. *Neuroimage*. 2012;61(4):1000-1016. doi:10.1016/J.NEUROIMAGE.2012.03.072
4. Daducci A, Canales-Rodríguez EJ, Zhang H, Dyrby TB, Alexander DC, Thiran JP. Accelerated Microstructure Imaging via Convex Optimization (AMICO) from diffusion MRI data. *Neuroimage*. 2015;105:32-44. doi:10.1016/J.NEUROIMAGE.2014.10.026
